# Supplementary material for: Quality of life after patient-initiated vs physician-initiated response to symptom monitoring: the SYMPRO-Lung trial
Source: PubMed Central journal article supplement (PMC10699799; doi:10.1093/jnci/djad159), 2023-08-21
Supplement: djad159_supplementary_data.pdf [file djad159_supplementary_data.pdf]

## Supplementary Materials

### Supplementary Methods

#### Primary outcomes

The Summary score was calculated as the mean of the combined scales of the QLQ-C30 scale scores (excluding financial impact and a two-item Global quality of life scale).<sup>1</sup> All scale scores were linearly transformed to 0-100, following EORTC guidelines. For both scales higher scores indicated improved functioning.

Cocks et al. guidelines were used to interpret the clinical relevance of within group change scores.<sup>2</sup> The Physical functioning thresholds for small and medium improvement were set at 2 to 7 and >7, respectively. The thresholds for small, medium and large deteriorations were set at -5 to -10, -10 to -17, and <-17 respectively. To date, no within group change score thresholds have been established for the Summary score; thus any level of change was investigated.

#### Secondary outcomes

The remaining QLQ-30 scales were chosen as our secondary outcomes. For the remaining functioning scales (Global health status, Role functioning, Emotional functioning, Cognitive functioning and Social functioning) higher scores indicated improved functioning. For the Symptom scales (fatigue, nausea and vomiting, pain, dyspnea, insomnia, appetite loss, constipation, diarrhea, and financial impact) higher scores indicated more symptoms/problems.<sup>3</sup> Likewise, Cocks guidelines were used to interpret clinically relevant changes.<sup>2</sup>

#### Sensitivity analyses

Sensitivity analyses were conducted to check the influence of missing values on our results. For this, we performed multiple imputation for those patients who had missing values at T1.<sup>4</sup> Missing patients were compared with non-missing patients, and between the control- and intervention group, to investigate if they were missing at random. Multiple imputation was based on patients with the same characteristics on age, gender, group, ECOG Performance Status (PS), histology, treatment, cancer stage and EORTC-QLQ-C30 scale scores on T0 and T1.

## References

1. Pompili C, Koller M, Velikova G, et al. EORTC QLQ-C30 summary score reliably detects changes in QoL three months after anatomic lung resection for non-small cell lung cancer (NSCLC). *Lung Cancer*. 2018;123:149-154.
2. Cocks K, King MT, Velikova G, et al. Evidence-based guidelines for interpreting change scores for the European Organisation for the Research and Treatment of Cancer Quality of Life Questionnaire Core 30. *Eur J Cancer*. Jul 2012;48(11):1713-21.  
doi:10.1016/j.ejca.2012.02.059
3. Fayers P AN, Bjordal K, Groenvold M, Curran D, Bottomley A. EORTC QLQ-C30 Scoring Manual. 3rd ed. *Brussels: European Organisation for Research and Treatment of Cancer*. 2001;
4. Gunnes N, Seierstad TG, Aamdal S, et al. Assessing quality of life in a randomized clinical trial: correcting for missing data. *BMC Med Res Methodol*. Apr 30 2009;9:28.  
doi:10.1186/1471-2288-9-28

## Supplementary Tables

Supplementary Table 1

| Completion rates by study week |     |           |       |                             |    |           |       |
|--------------------------------|-----|-----------|-------|-----------------------------|----|-----------|-------|
| Active intervention group      |     |           |       | Reactive Intervention group |    |           |       |
| Week                           | n   | Completed | Rate  | Week                        | n  | Completed | Rate  |
| 0                              | 69  | 39        | 56,5% | 0                           | 35 | 33        | 94,3% |
| 1                              | 128 | 95        | 74,2% | 1                           | 61 | 55        | 90,2% |
| 2                              | 145 | 115       | 79,3% | 2                           | 82 | 66        | 80,5% |
| 3                              | 155 | 109       | 70,3% | 3                           | 87 | 61        | 70,1% |
| 4                              | 155 | 106       | 68,4% | 4                           | 86 | 62        | 72,1% |
| 5                              | 156 | 103       | 66,0% | 5                           | 88 | 60        | 68,2% |
| 6                              | 155 | 100       | 64,5% | 6                           | 88 | 58        | 65,9% |
| 7                              | 153 | 100       | 65,4% | 7                           | 88 | 54        | 61,4% |
| 8                              | 152 | 107       | 70,4% | 8                           | 86 | 60        | 69,8% |
| 9                              | 149 | 92        | 61,7% | 9                           | 86 | 52        | 60,5% |
| 10                             | 149 | 89        | 59,7% | 10                          | 86 | 56        | 65,1% |
| 11                             | 147 | 91        | 61,9% | 11                          | 86 | 52        | 60,5% |
| 12                             | 144 | 92        | 63,9% | 12                          | 85 | 57        | 67,1% |
| 13                             | 143 | 93        | 65,0% | 13                          | 85 | 55        | 64,7% |
| 14                             | 143 | 86        | 60,1% | 14                          | 85 | 54        | 63,5% |
| 15                             | 140 | 101       | 72,1% | 15                          | 83 | 59        | 71,1% |
|                                |     |           | 66,2% |                             |    |           | 70,3% |

## Supplementary Table 2

Sensitivity analyses with multiple imputation for missing individuals for difference in mean change scores for multivariable linear regression health-related quality of life from baseline to 15 weeks intervention versus control group including confounders.

| <b>EORTC-QLQ-C30</b>                           |                    |                      |                      |                                                  | <b>Multivariable analyses</b> |                |                |           |
|------------------------------------------------|--------------------|----------------------|----------------------|--------------------------------------------------|-------------------------------|----------------|----------------|-----------|
| <b>N = 515 (intervention 249, control 266)</b> |                    | <b>Mean baseline</b> | <b>Mean 15 weeks</b> | <b>Mean change score and clinical relevance*</b> | <b>B (SE)</b>                 | <b>95% CI</b>  | <b>p-value</b> | <b>ES</b> |
| <i>Functioning Scales</i>                      |                    |                      |                      |                                                  |                               |                |                |           |
| QLQ summary score                              | Intervention group | 73.95                | 78.93                | +4.98<br>n/a                                     | 3.87 (1.44)                   | 1.03 – 6.71    | 0.008          | 0.42      |
|                                                | Control group      | 75.55                | 75.69                | +0.14<br>n/a                                     |                               |                |                |           |
| Physical functioning                           | Intervention group | 71.22                | 72.62                | +1.40<br>Trivial                                 | 6.03 (1.93)                   | 2.26 – 9.81    | 0.002          | 0.56      |
|                                                | Control group      | 72.08                | 66.59                | -5.49<br>Small deterioration                     |                               |                |                |           |
| Role functioning                               | Intervention group | 61.78                | 63.81                | +2.03<br>Trivial                                 | 7.36 (2.75)                   | 1.95 – 12.76   | 0.008          | 0.36      |
|                                                | Control group      | 61.47                | 55.97                | -5.50<br>Trivial                                 |                               |                |                |           |
| Social functioning                             | Intervention group | 71.35                | 76.78                | +5.43<br>Small improvement                       | 7.74 (2.64)                   | 2.52 – 12.96   | 0.004          | 0.44      |
|                                                | Control group      | 73.62                | 70.60                | -3.02<br>Trivial                                 |                               |                |                |           |
| <i>Symptom Scales</i>                          |                    |                      |                      |                                                  |                               |                |                |           |
| Fatigue                                        | Intervention group | 40.38                | 35.78                | +4.60<br>Small improvement                       | -7.18 (2.71)                  | -12.54 – -1.81 | 0.009          | 0.41      |
|                                                | Control group      | 41.14                | 42.22                | -1.08<br>Trivial                                 |                               |                |                |           |
| Dyspnea                                        | Intervention group | 33.87                | 34.31                | -0.44<br>Trivial                                 | -9.32 (2.91)                  | -15.04 – -3.60 | 0.001          | 0.53      |
|                                                | Control group      | 35.21                | 43.43                | -8.22<br>Small deterioration                     |                               |                |                |           |
| Constipation                                   | Intervention group | 22.76                | 12.41                | +10.35<br>Medium improvement                     | -7.41 (2.31)                  | -11.94 – -2.88 | 0.001          | 1.15      |
|                                                | Control group      | 15.79                | 15.76                | +0.03<br>Trivial                                 |                               |                |                |           |

EORTC Quality of life score and functioning scales: higher score = better QOL/functioning. EORTC Symptom scales: higher score = worse symptoms.

---

Abbreviations: T1, 15 weeks; ES, Cohen's D effect size: 0.2 = small, 0.5 = medium, 0.8 = large. *P*-values for between group comparisons.

\*Clinical relevance according to guidelines of Cocks et al. 2012 for longitudinal within-group differences.<sup>2</sup>

Multivariable analyses were controlled for histology, treatment, cancer stage, baseline score and transfer sequence of the hospitals.

# Supplementary Figures

## Supplementary Figure 1

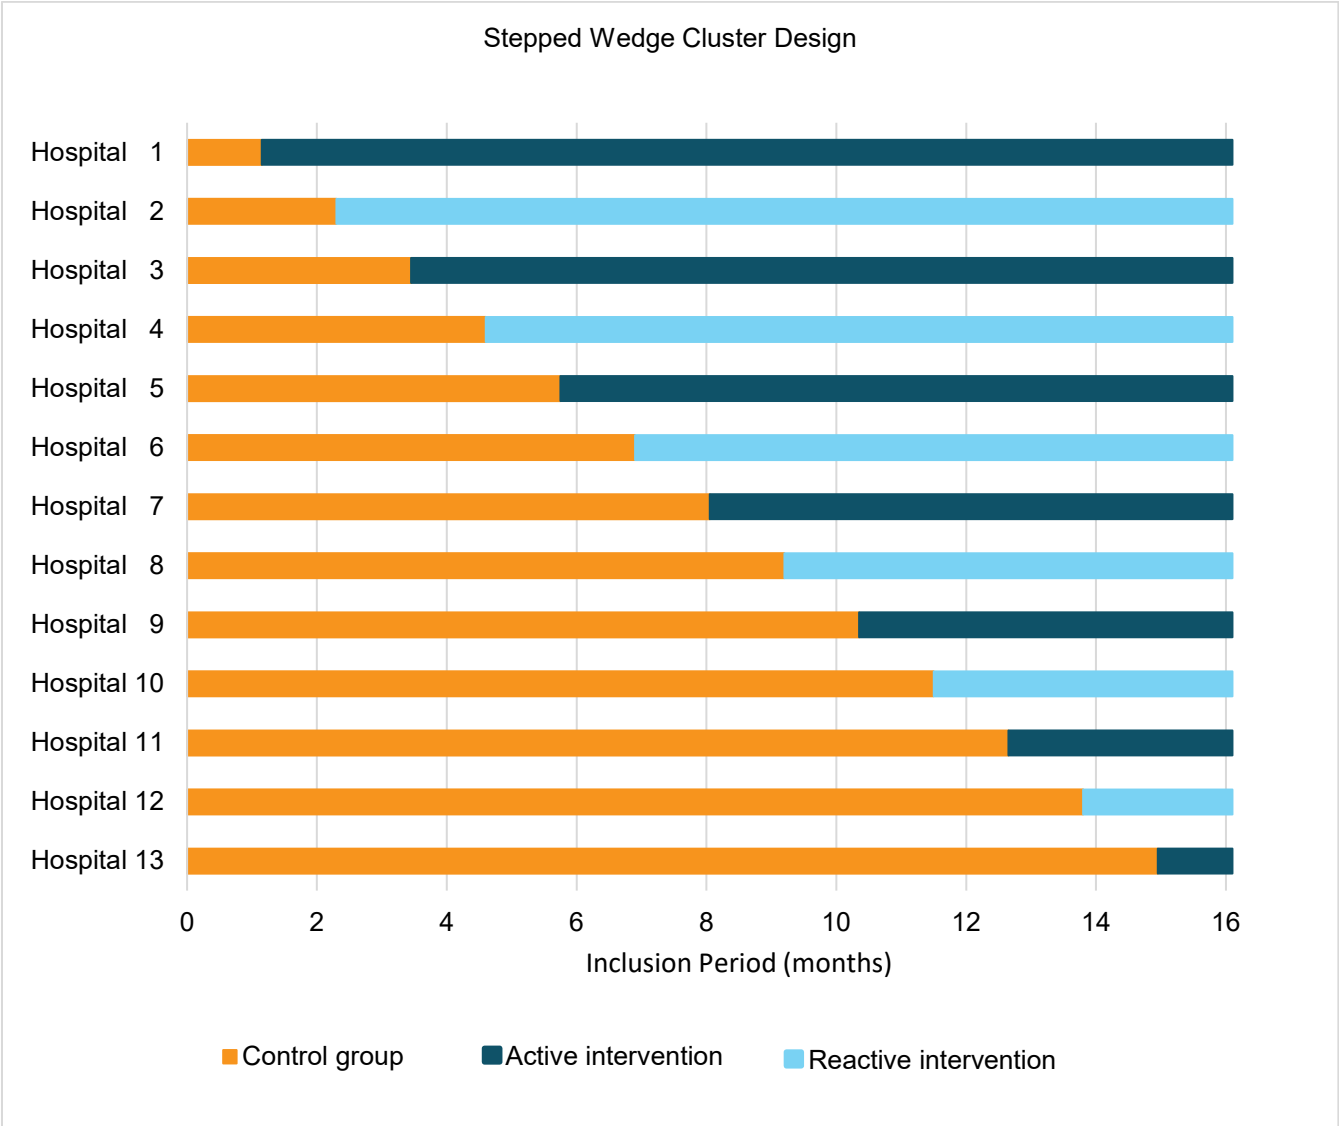

## Supplementary Figure 2

Proportion of patients with health-related quality of life changes at 15 weeks (T1) compared with baseline

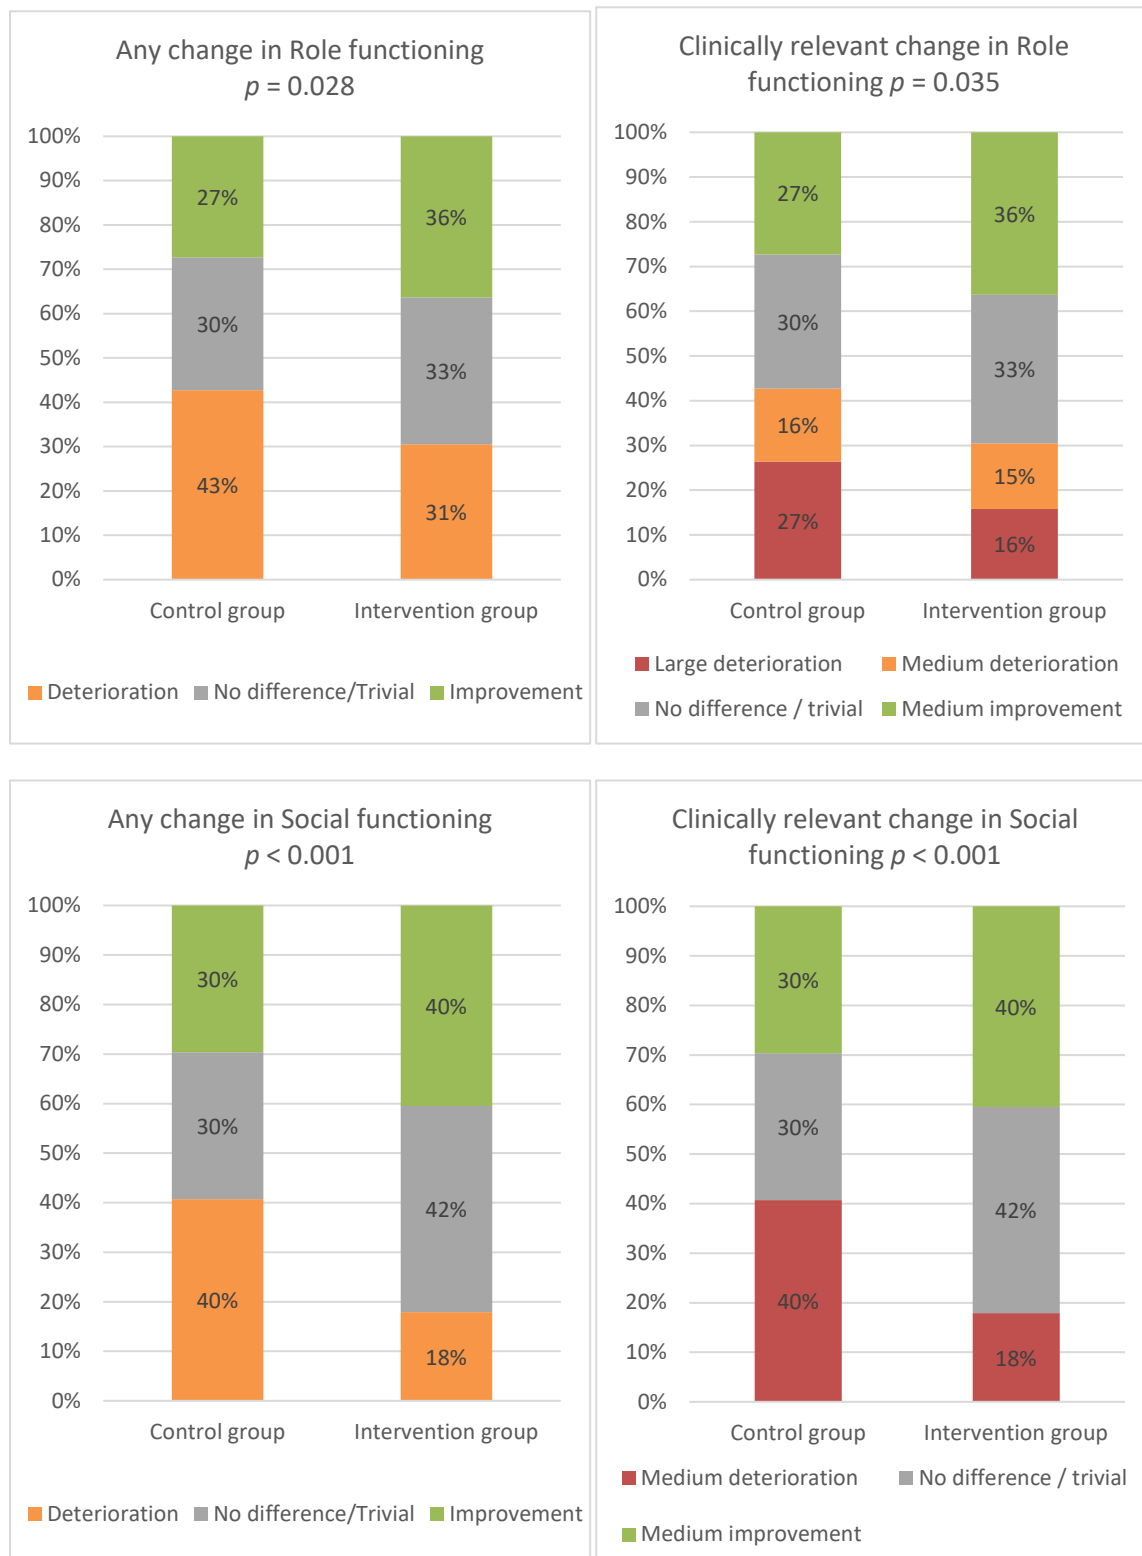

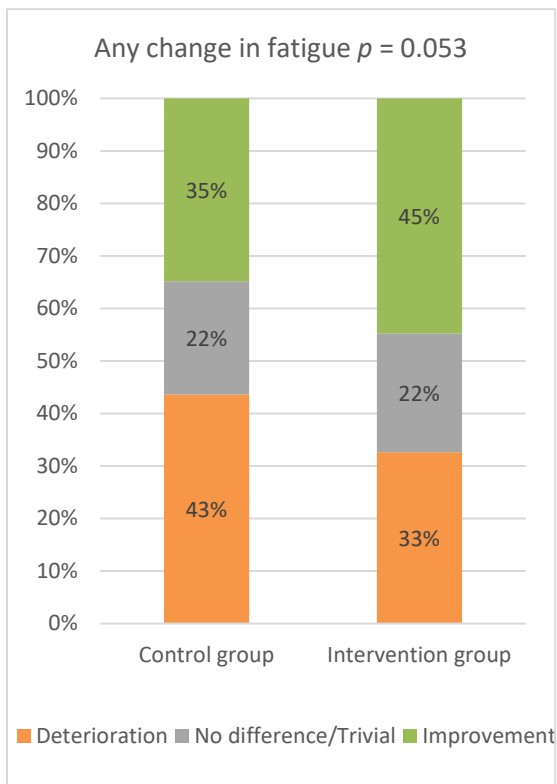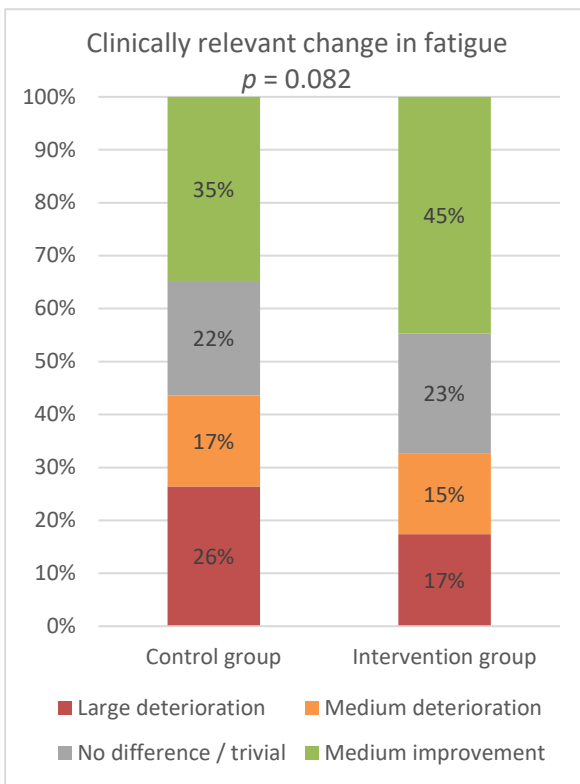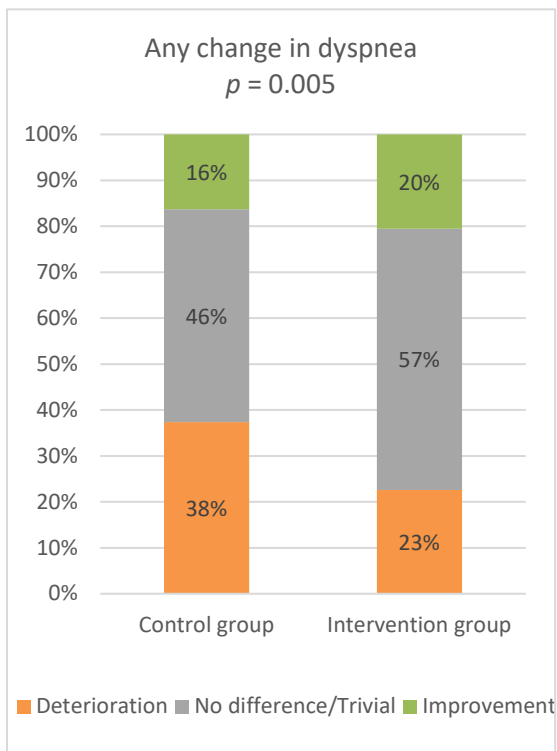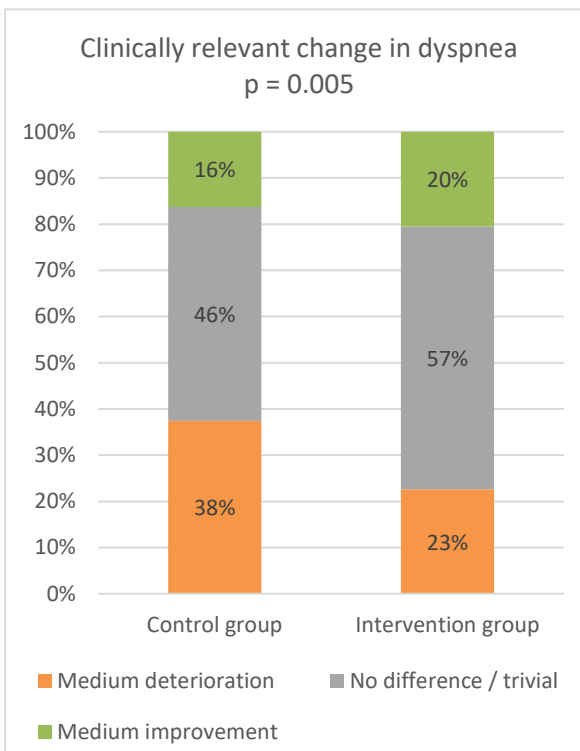



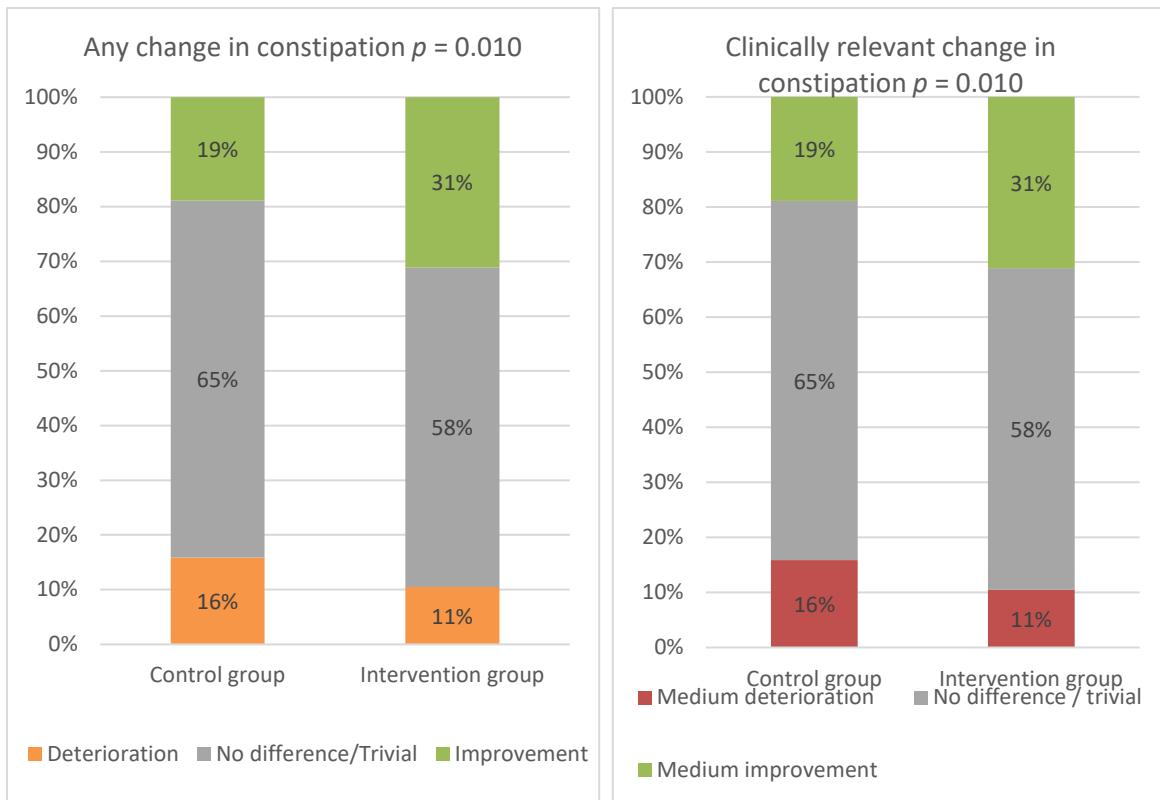

Proportion of patients with health-related quality of life changes at 15 weeks (T1) compared with baseline. For the clinically relevant changes Cocks' guidelines for within group changes were used:<sup>2</sup> Role functioning: Improvements >12 medium, 12-6 small; No difference/trivia 6 to -7; Deteriorations -7 to -14 small, -14 to -22 medium, <-22 large. Social functioning: Improvements >8 medium, 8-3 small; No difference/trivia 3 to -6; Deteriorations -11 to -6 small, <-11 medium. Fatigue: Improvements >9 medium, -9 to -4 small; No difference/trivia -4 to 5; Deteriorations 5-10 small, 10-15 medium, <15 large. Dyspnea: Improvements >9 medium, -9 to -2 small; No difference/trivia -2 to 5; Deteriorations 5-11 small, <11 medium. Constipation: Improvements >-10 medium, -10 to -4 small; No difference/trivia -4 to 5; Deteriorations 5-15 small, <15 medium. *P*-values were calculated using Pearson's Chi-Square tests comparing the control- versus the intervention group.
